# Supplementary material for: SMURF2 regulates bone homeostasis by disrupting SMAD3 interaction with vitamin D receptor in osteoblasts
Source: PubMed Central journal article supplement (PMC5321737; doi:10.1038/ncomms14570), 2017-02-20
Supplement: ncomms14570-s1.pdf [file ncomms14570-s1.pdf]

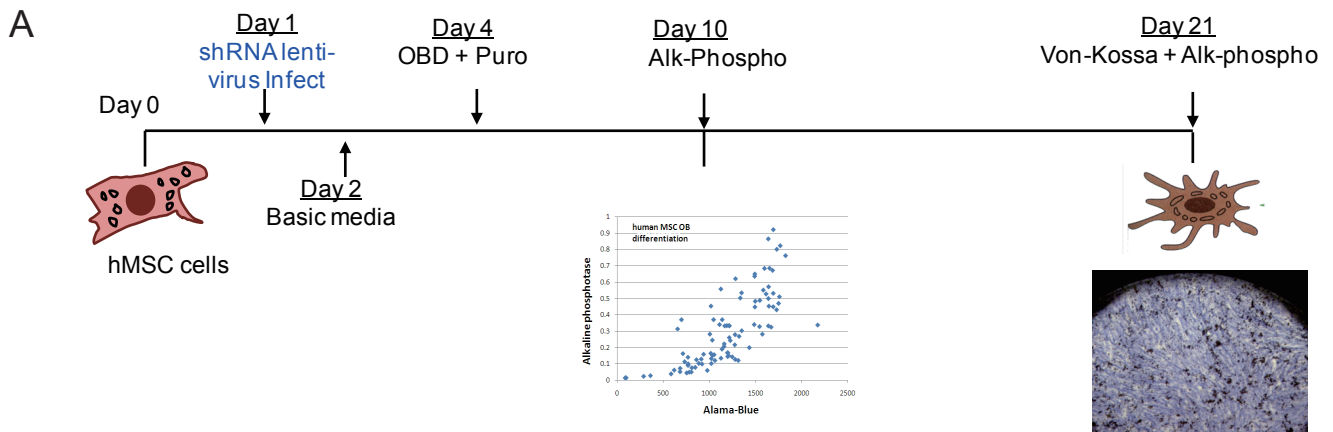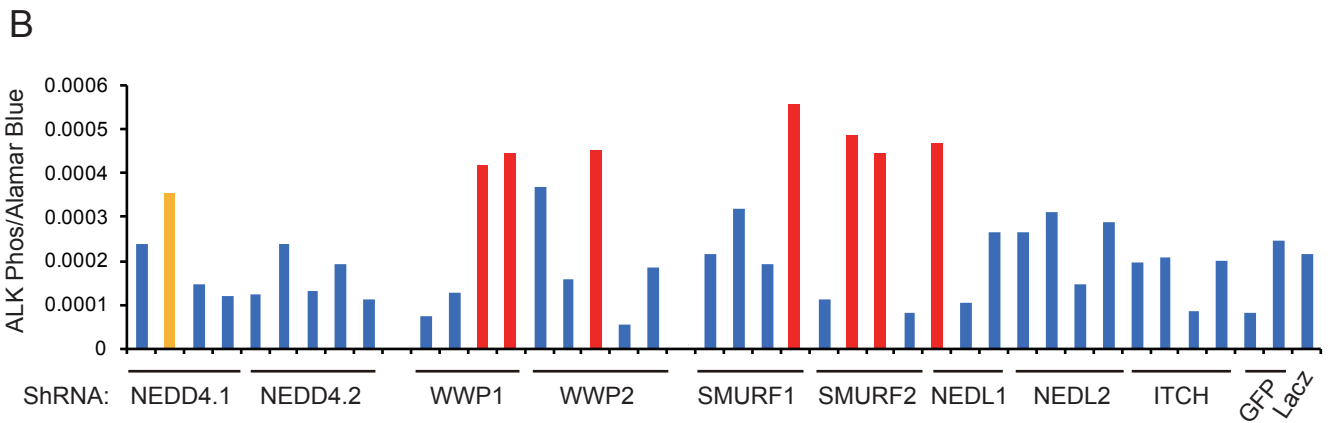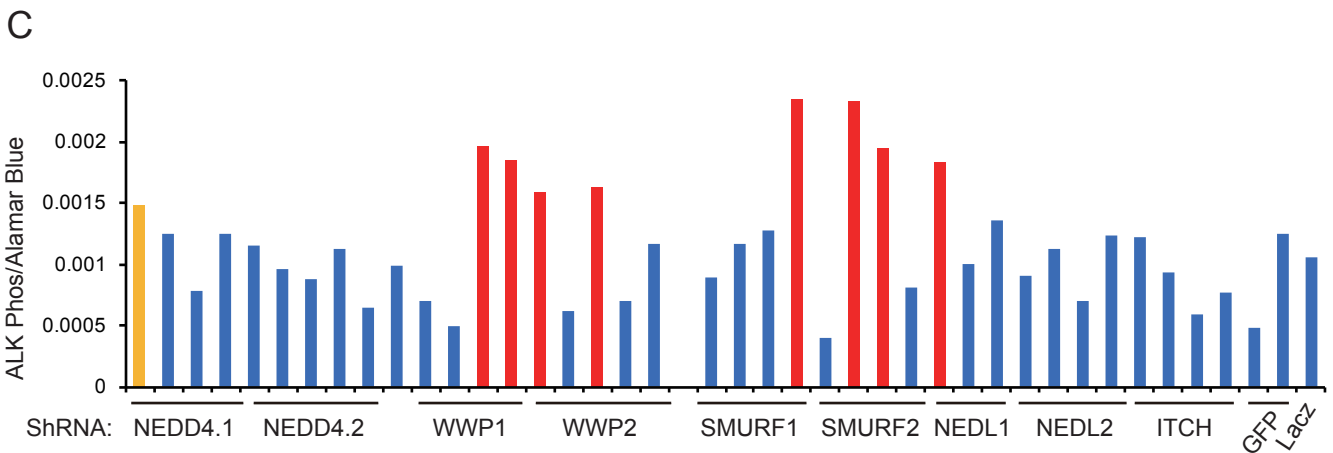

**Supplementary Figure 1. RNAi-based loss-of-function screen in human mesenchymal stem cells.** (A) Schematic of lentiviral based shRNA screen utilizing hMSCs. (B-C), Analysis of ALP in two independent experiments using hMSC cells derived from two different donors after infection with shRNAs targeting different members of NEDD4 E3 ligases, GFP and LacZ.

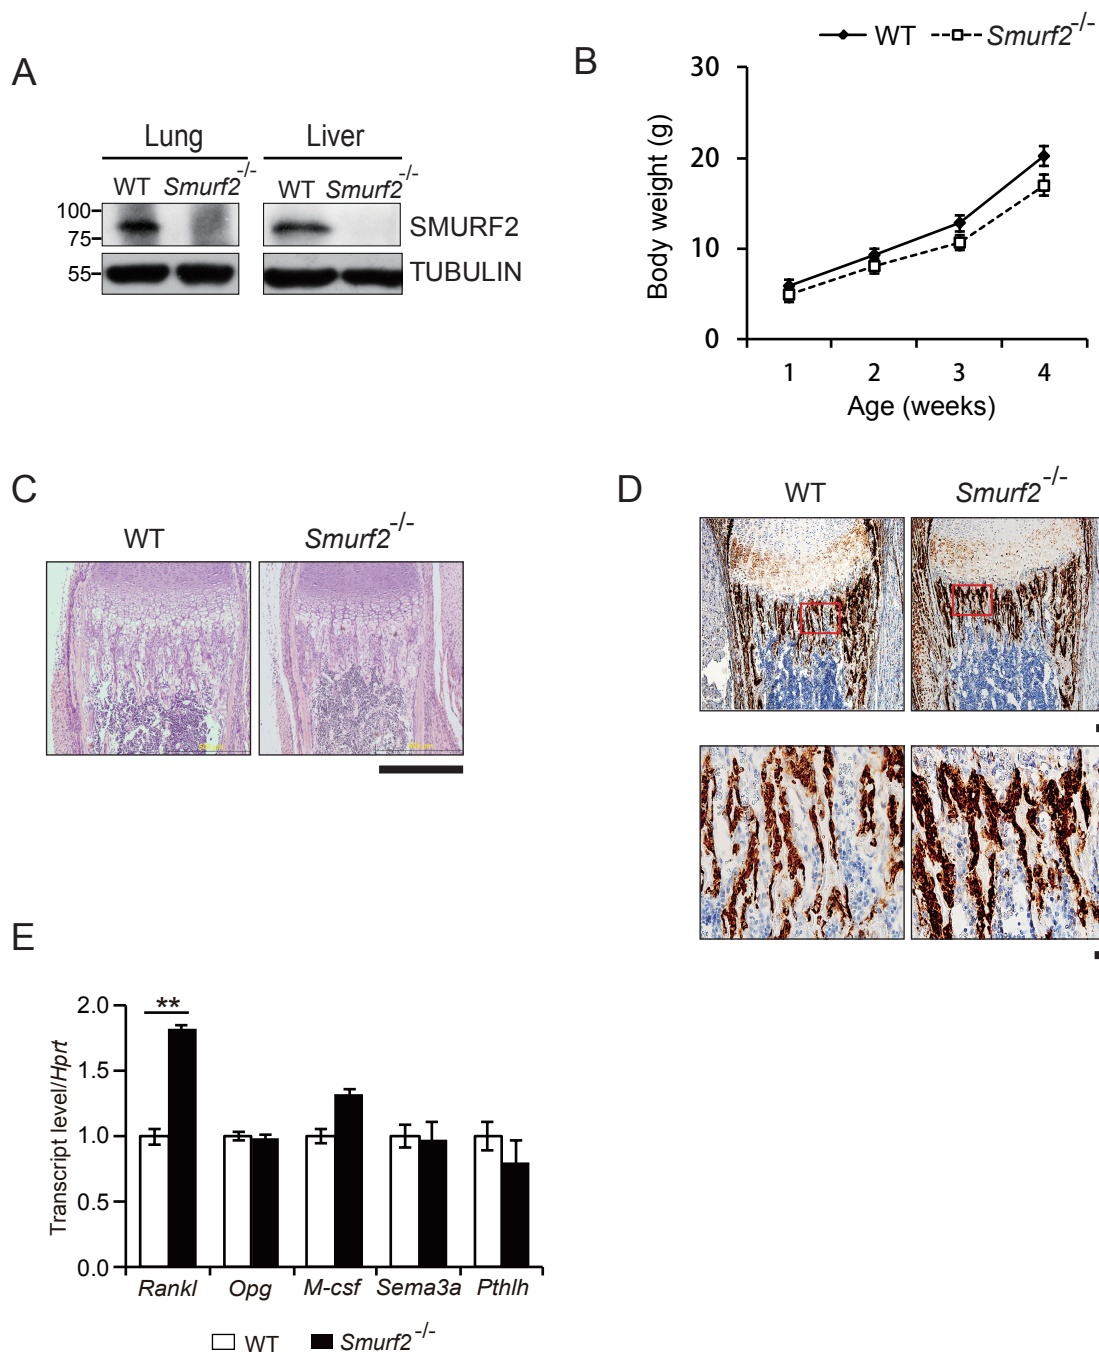

**Supplementary Figure 2. The phenotype of global *Smurf2* knockout mice.** (A) Immunoblot for SMURF2 and TUBULIN in lung and liver derived from the wild type and *Smurf2*<sup>-/-</sup> mice. (B) Body weight analysis of WT and *Smurf2*<sup>-/-</sup> male mice, n=10 for each genotype. (C) H&E staining of tibia of 1-week-old male WT and *Smurf2*<sup>-/-</sup> mice, Scale bar, 500µm. (D) In situ hybridization for collagen I (col I) in the tibia of 1-week-old male WT and *Smurf2*<sup>-/-</sup> mice, (upper, scale bar, 100µm; bottom, scale bar 25µm). (E) Gene expression of major osteoclast differentiation regulators in osteoblast cells from long bone marrow of 5-week-old male mice. All data are the mean ± s.d. \*P<0.05, \*\*P<0.01, \*\*\*P<0.001. Student's t-test was performed.

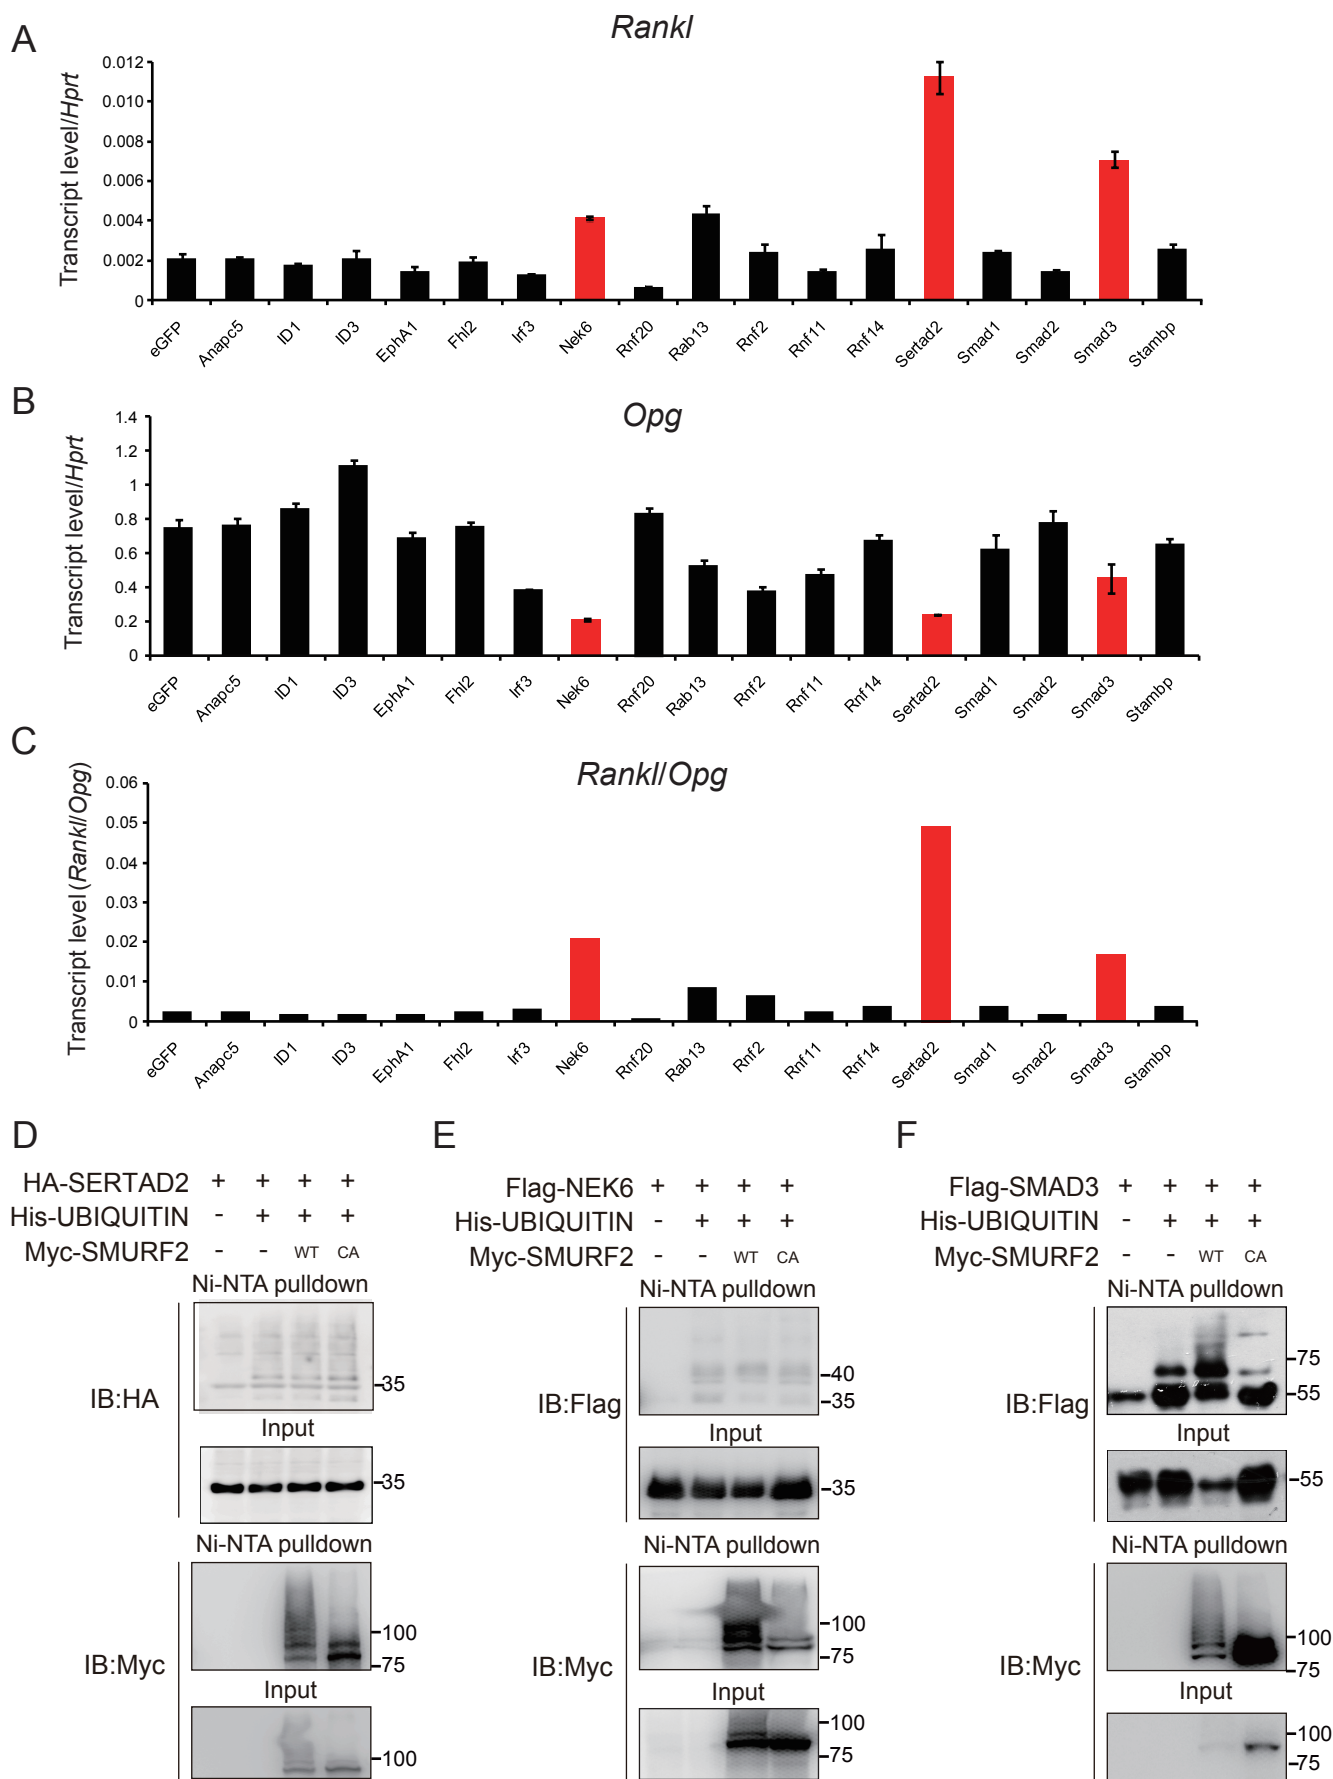

**Supplementary Figure 3. The screen of the proteins known to interact with SMURF2.** (A-C) mRNA expression of *Rankl*, *Opg* and the ratio of *Rankl/Opg* in C3H10T1/2 cells infected with lentivirus expressing the proteins known to interact with SMURF2. (D-F) HEK293T cells were transfected with the indicated plasmids, and cell lysates were precipitated with Ni-NTA beads and then immunoblotted with the indicated antibodies. All data are the mean  $\pm$  s.d.

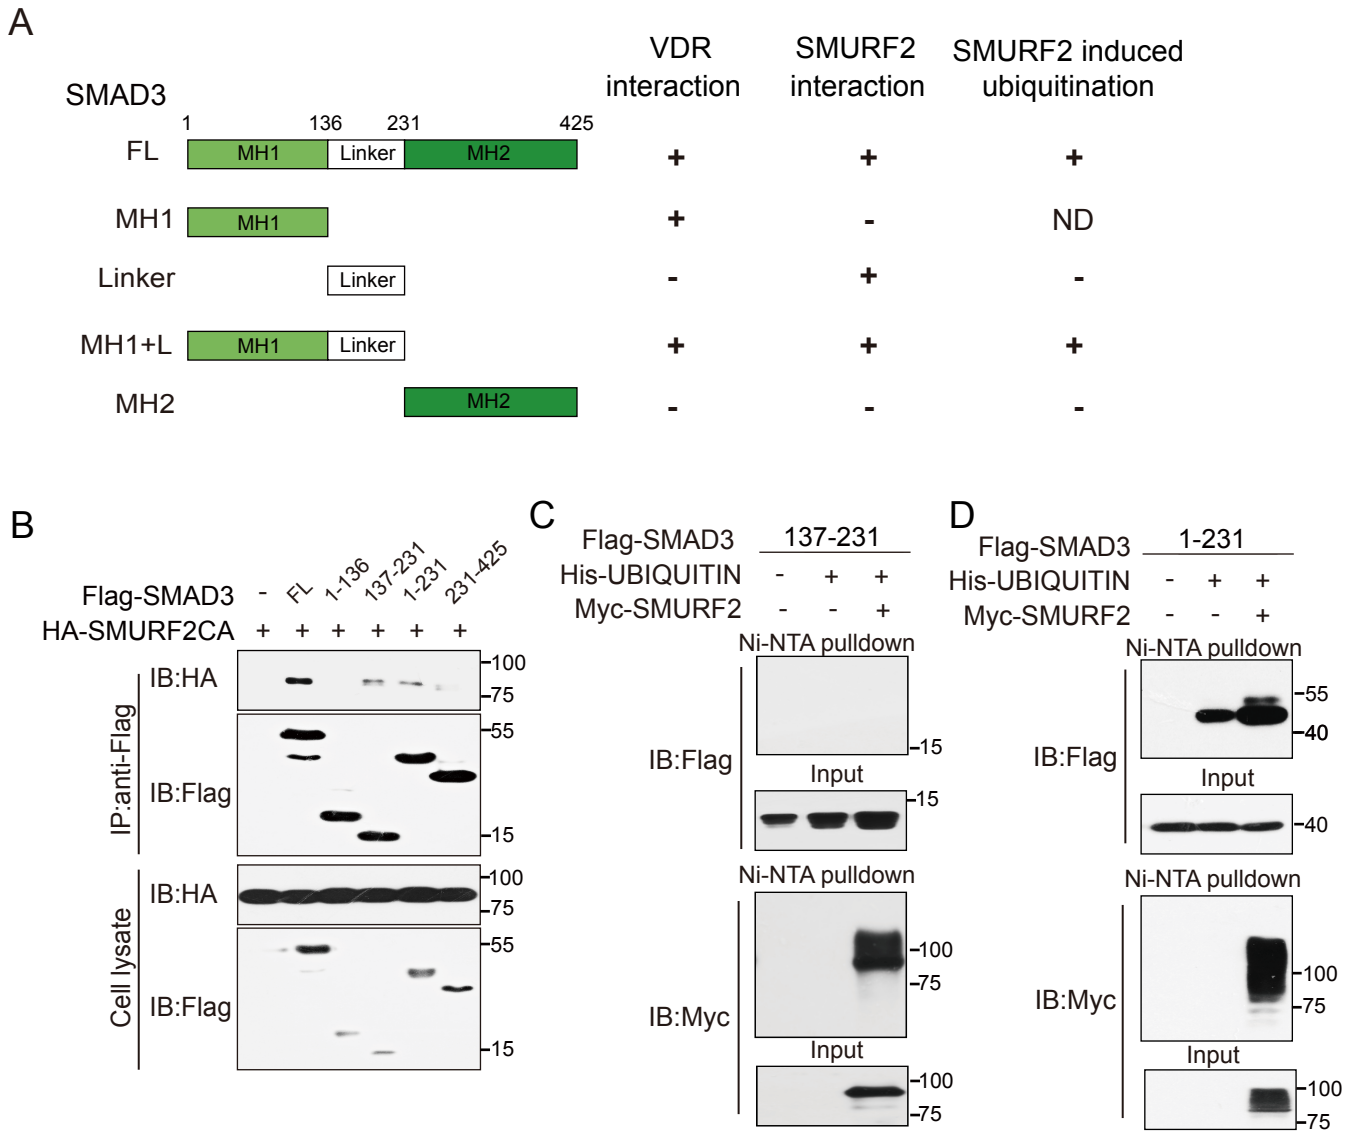

**Supplementary Figure 4. Interaction of SMAD3 domains with VDR and SMURF2.** (A) Interaction of SMAD3 domains with VDR and SMURF2. VDR and SMURF2 were tested for the interaction with the indicated truncations of SMAD3 in a GST-pull down assay and Co-immunoprecipitation assay (–, no interaction; +, interaction; ND, not detected). (B) Co-immunoprecipitation of SMAD3 truncations and VDR in 293T cells. (C-D) SMURF2 induced ubiquitination of the indicated truncations of SMAD3.

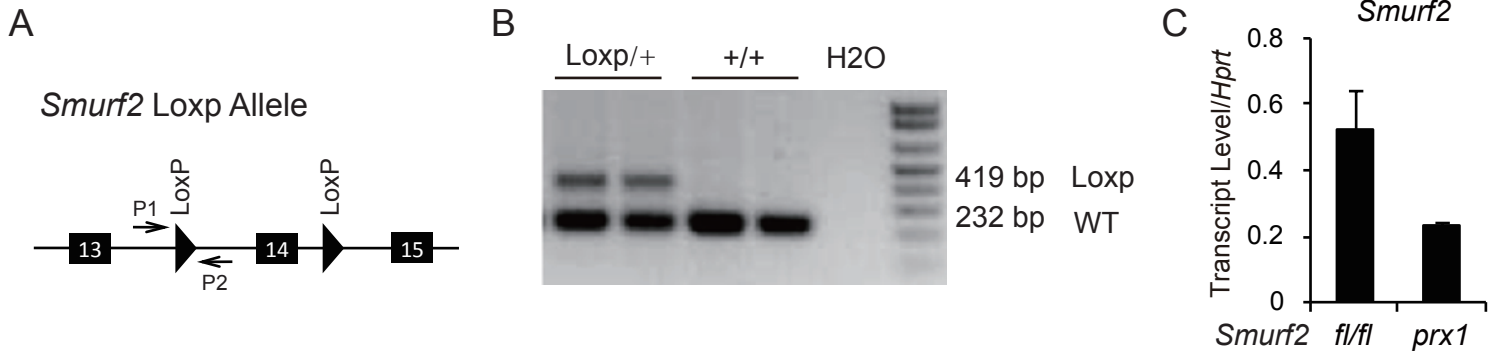

**D** Undifferentiation

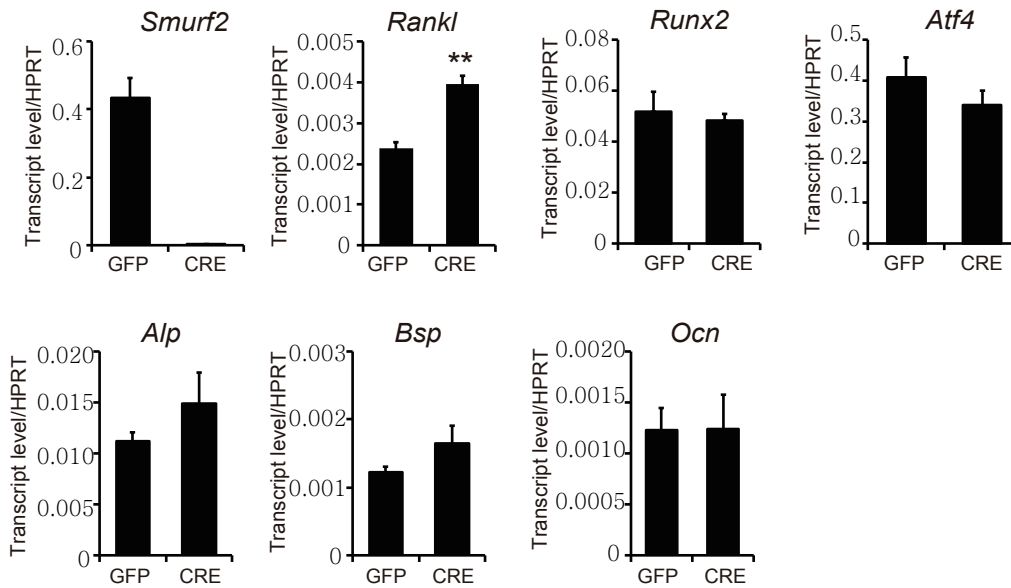

**E** Osteoblast differentiation for 4 days

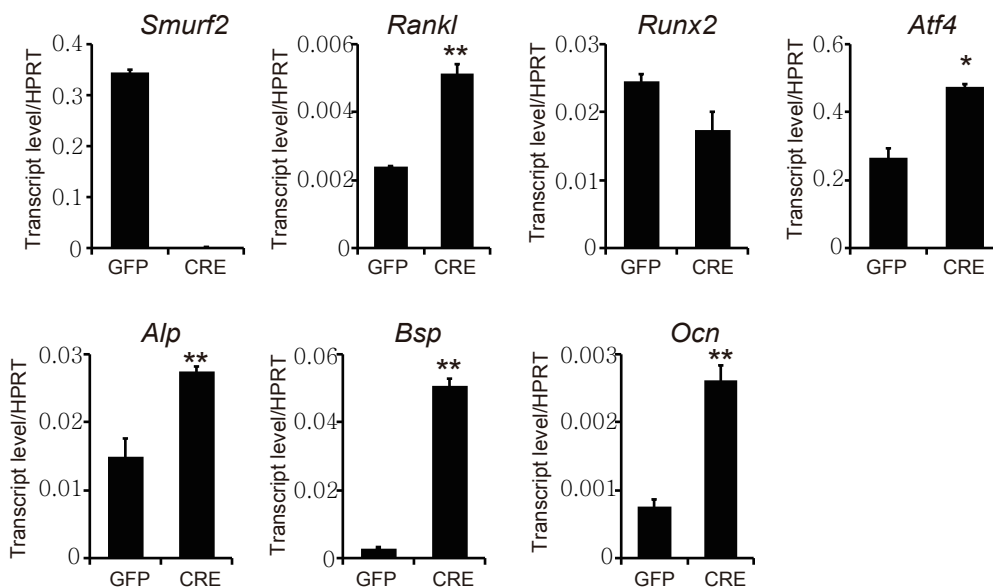

**Supplementary Figure 5. Gene expression of the undifferentiated and differentiated *Smurf2*<sup>F/F</sup> osteoblasts infected by lentivirus expressing GFP and CRE. (A) Targeting strategy used to generate a floxed allele of *Smurf2*. (B) Genotype PCR analysis of WT and *Smurf2*<sup>fl/+</sup> mice. (C) Expression of *Smurf2* mRNA from femur of *Smurf2*<sup>fl/fl</sup> and *Smurf2*<sup>prx1</sup> mice. (D) Analysis of gene expression of the undifferentiated *Smurf2*<sup>F/F</sup> osteoblasts infected by lentivirus expressing GFP and CRE. (E) Analysis of gene expression of *Smurf2*<sup>F/F</sup> osteoblasts infected by lentivirus expressing GFP and CRE cultured in osteoblast differentiation medium for 4d. All data are the mean  $\pm$  s.d. \*P<0.05, \*\*P<0.01, \*\*\*P<0.001. Student's t-test was performed.**

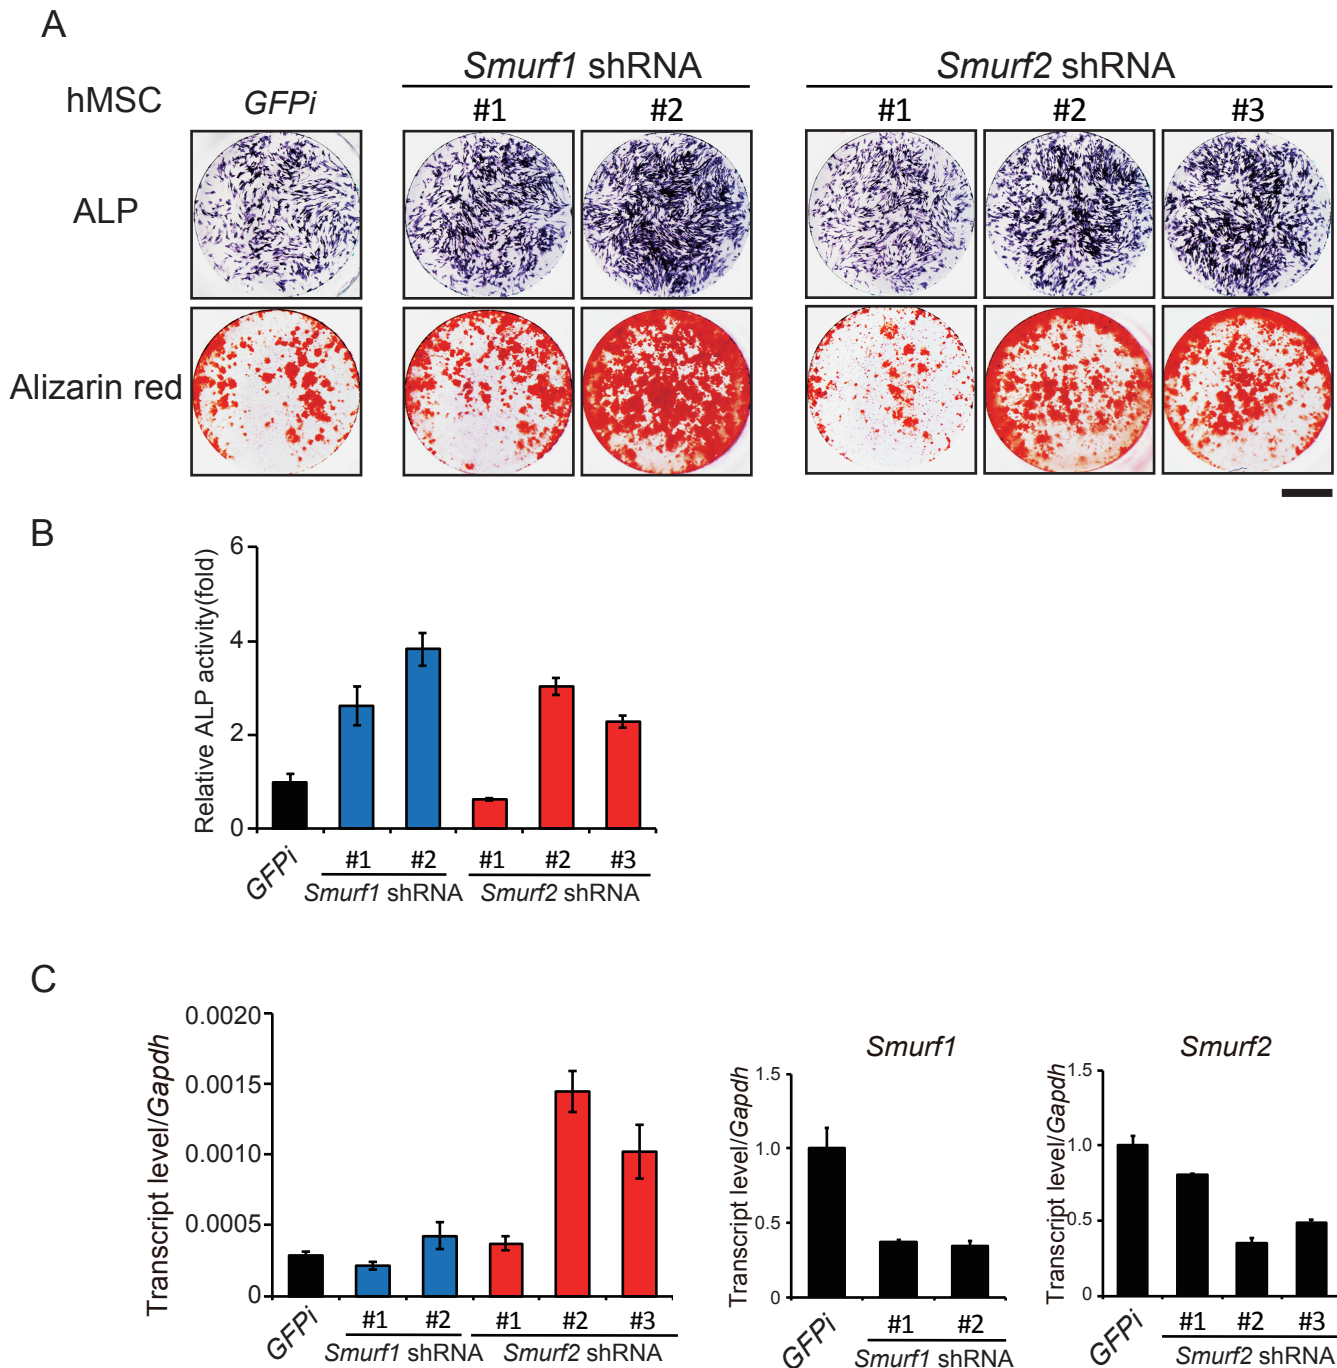

**Supplementary Figure 6. The effects of SMURF2 and SMURF1 on the OB differentiation and *Rankl* expression with primary human mesenchymal stem cells.** (A) Representative images for combined ALP (blue) and Alizarin red (red) staining of hMSCs infected with lentivirus expressing control or *Smurf1/Smurf2* shRNAs cultured in osteoblast differentiation medium for 7d and 14d, Scale bar, 0.25cm. (B) Analysis of ALP expression in hMSCs infected with lentivirus expressing control or *Smurf1/Smurf2* shRNAs, n=3 for each group. (C) qRT-PCR analysis of *Rankl* expression and knockdown efficiency of *Smurf1* and *Smurf2* in hMSCs infected with lentivirus expressing control or *Smurf1/Smurf2* shRNAs cultured in osteoblast differentiation medium for 7d.

A

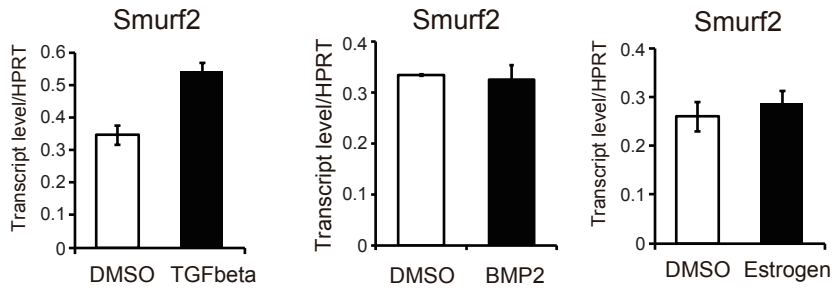

B

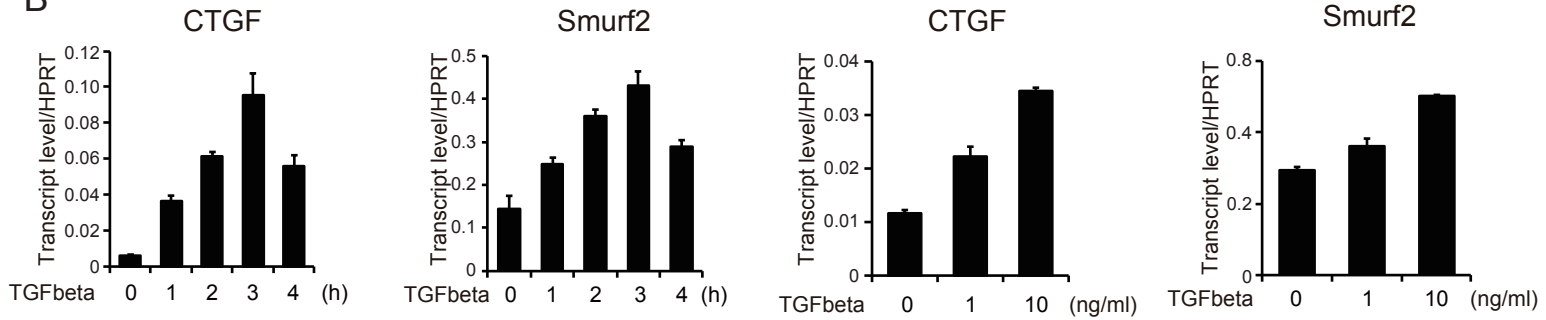

**Supplementary Figure 7. TGF- $\beta$  is the upstream regulator of Smurf2 expression.** (A) Regulation of Smurf2 expression by potential upstream regulators. calvarial osteoblasts were cultured with different factors for 24h. TGF- $\beta$ :10ng/ml; BMP2: 100ng/ml; Estrogen:100nM. (B) TGF- $\beta$  could increase smurf2 expression in a dose-dependent and time-dependent manner. calvarial osteoblasts were cultured in the presence of 10ng/ml TGF- $\beta$  for the indicated times or cultured with gradient concentrations of TGF- $\beta$  for 3h, CTGF, as a positive control, is a downstream target gene of TGF- $\beta$  signaling pathway .

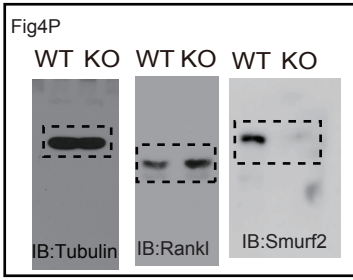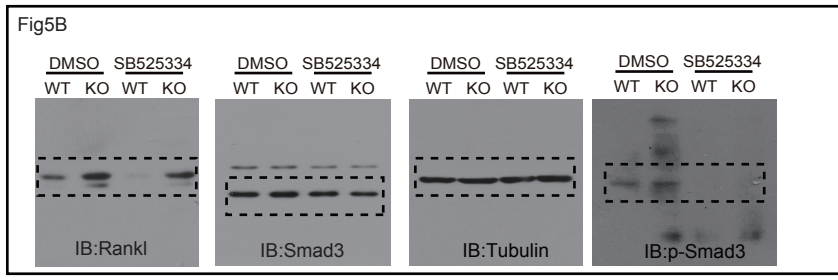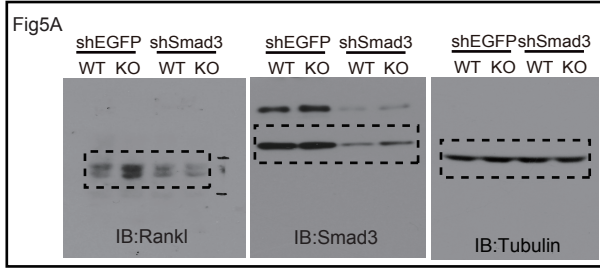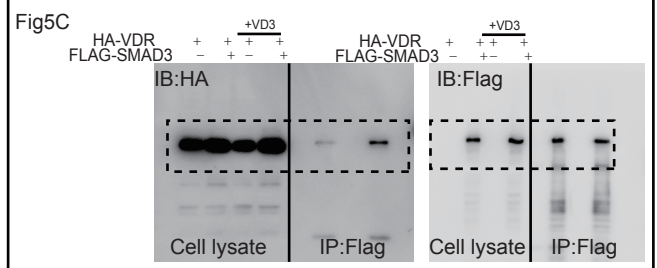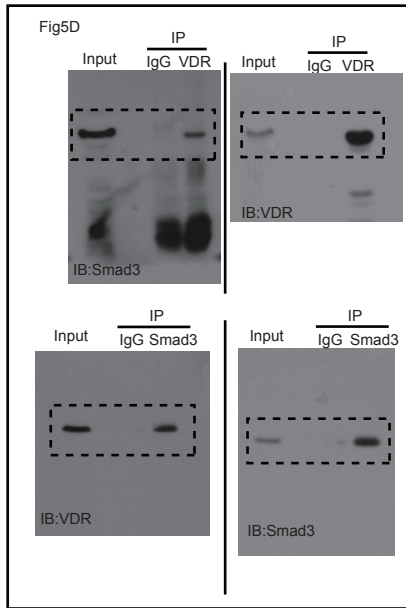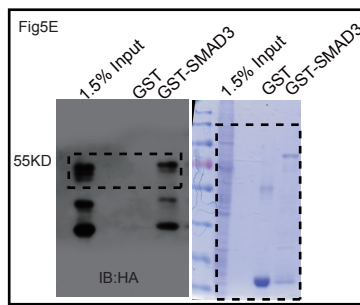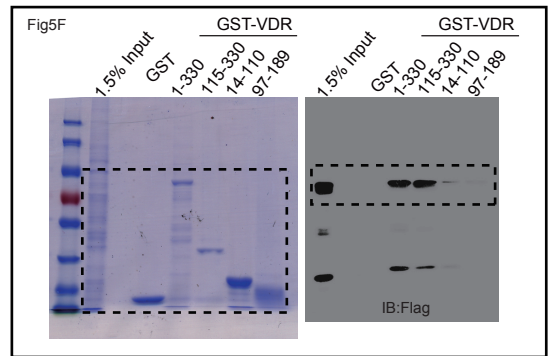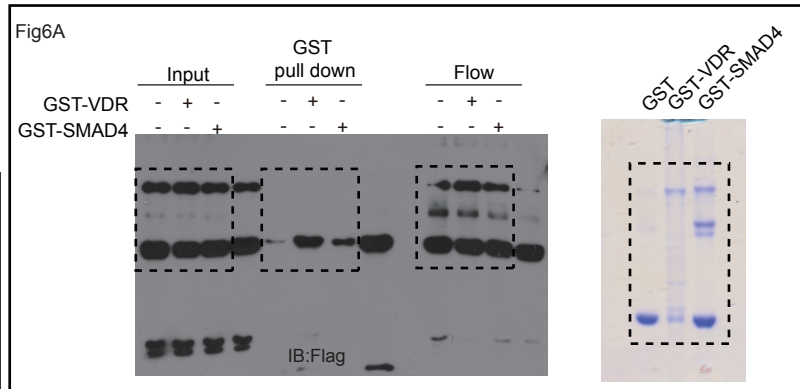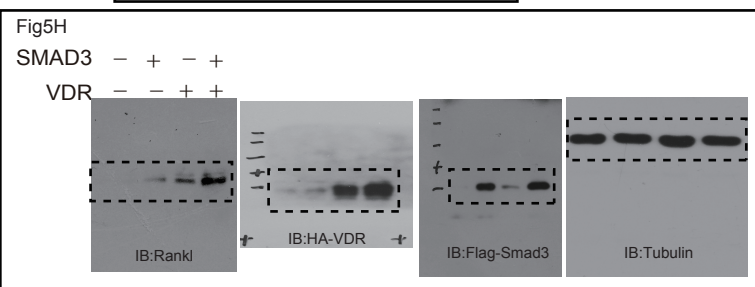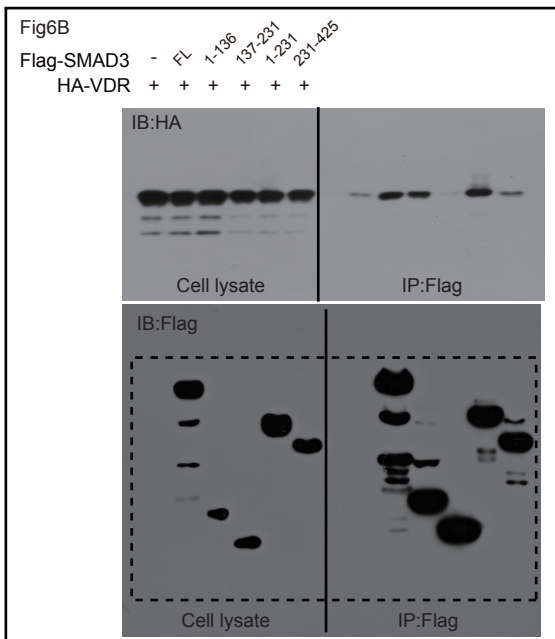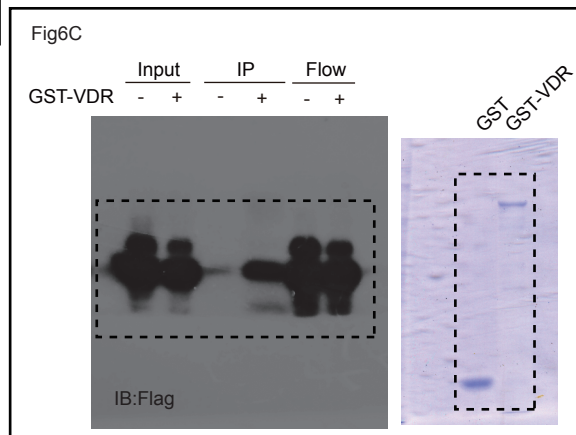



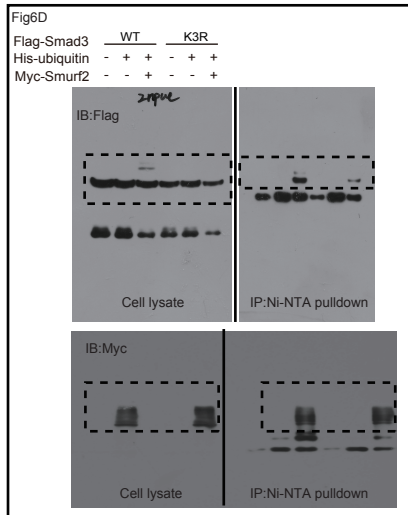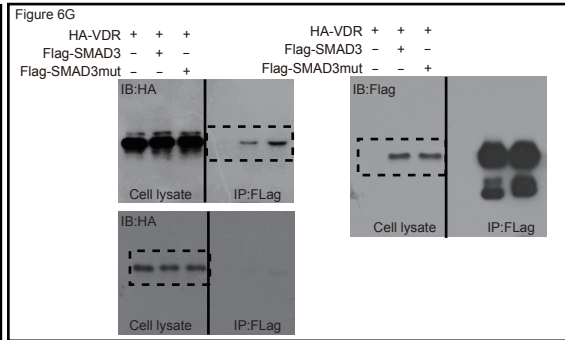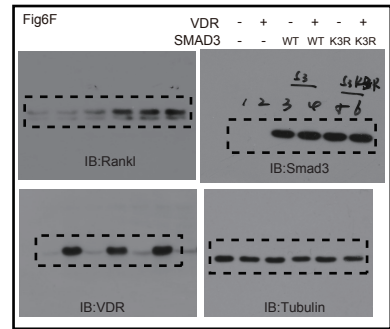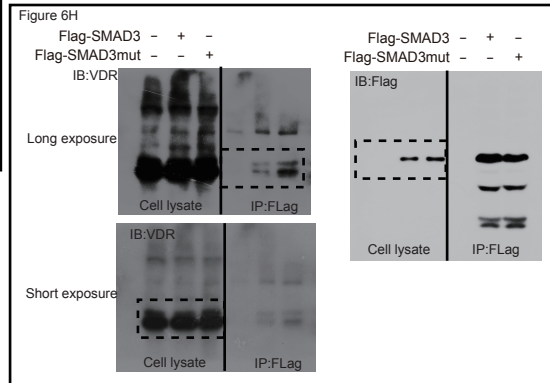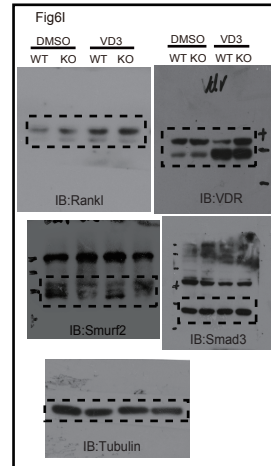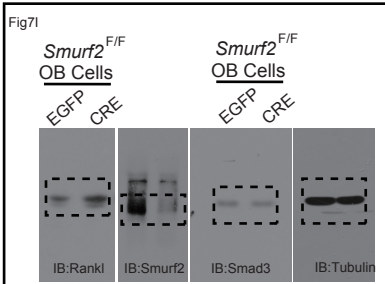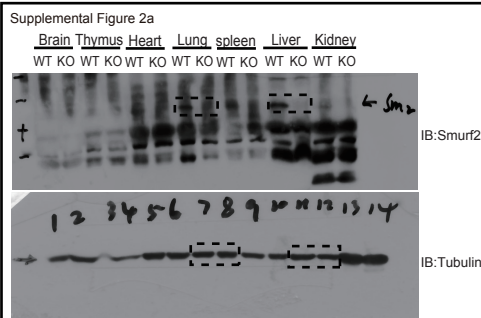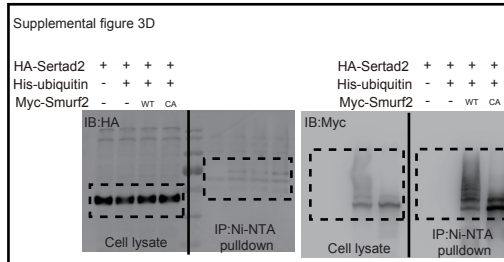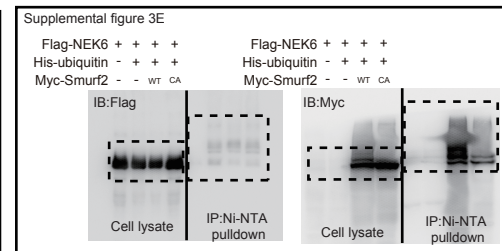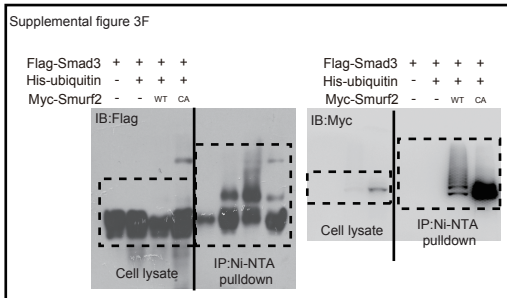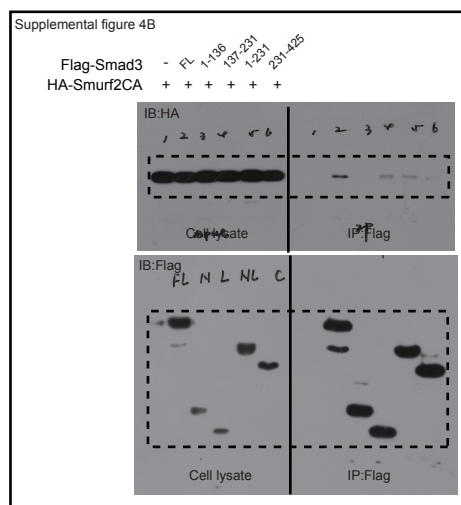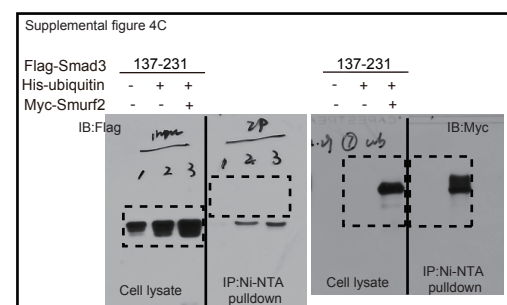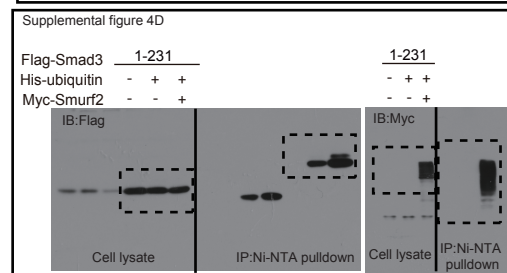

| Parameters                                      | WT (n=6)    | <i>Smurf2</i> KO (n=6) | <i>p</i> value |
|-------------------------------------------------|-------------|------------------------|----------------|
| BV/TV (%)                                       | 6.301±0.64  | 2.66±1.15*             | 0.022          |
| Tb.Th (µm)                                      | 27.644±2.10 | 26.86±2.70             | 0.8287         |
| Tb.N (/mm)                                      | 2.26±0.12   | 0.87±0.28**            | 0.0012         |
| Tb.Sp (µm)                                      | 421±26      | 1607±381*              | 0.0112         |
| MS/BS (%)                                       | 28.345±2.52 | 26.99±2.05             | 0.6986         |
| MAR (µm/day)                                    | 2.35±0.11   | 2.21±0.17              | 0.5203         |
| BFR/BS (µm <sup>3</sup> /µm <sup>2</sup> /year) | 237±12      | 217±22                 | 0.4514         |
| BFR/BV (%/year)                                 | 1515±113    | 1565±149               | 0.8022         |
| BFR/TV (%/year)                                 | 111±10      | 43±10***               | 0.0009         |
| Ob.S/BS (%)                                     | 12.12±1.12  | 18.87±2.75*            | 0.0485         |
| N.Ob/T.Ar (/mm <sup>2</sup> )                   | 48.088±3.82 | 25.72±6.89*            | 0.019          |
| N.Ob/B.Pm (/mm)                                 | 10.83±1.14  | 15.58±1.32*            | 0.02461        |
| OV/TV (%)                                       | 0.052±0.007 | 0.050±0.022            | 0.9268         |
| OS/BS (%)                                       | 3.020±0.44  | 7.73±2.67              | 0.1135         |
| O.Th (µm)                                       | 3.98±0.41   | 3.53±1.33              | 0.756          |
| Oc.S/BS (%)                                     | 2.504±0.56  | 4.94±0.64*             | 0.0199         |
| N.Oc/T.Ar (/mm <sup>2</sup> )                   | 3.788±1.04  | 3.76±1.79              | 0.989          |
| N.Oc/B.Pm (/mm)                                 | 0.797±0.19  | 1.89±0.31*             | 0.015          |
| ES/BS (%)                                       | 0.99±0.22   | 2.10±0.68              | 0.153          |

**Supplementary Table 1. Histomorphometry analysis of *Smurf2* KO mice.** 5 week old female *Smurf2* KO mice and wild type control mice were injected with calcein. 3 days later mice were injected with calcein again. 2 days later mice were sacrificed and tibiae were processed for quantitative histomorphometric analysis at proximal tibiae, which revealed that *Smurf2* knockout mice had a significant decrease in cancellous bone volume (59%) and trabecular number (62%) with concomitant increase in trabecular spacing (281%) but no change in trabecular thickness, a characteristic of hyper-resorption phenotypes. Indeed, the decreased bone volume was associated with a significant increase in bone resorption parameters (Oc.S/BS and N.Oc/Bpm).

\**p*<0.05 compared to WT, unpaired t test

\*\**p*<0.01 compared to WT

\*\*\**p*<0.001 compared to WT
